# Supplementary material for: Disturbance of floral colour pattern by activation of an endogenous pararetrovirus, petunia vein clearing virus, in aged petunia plants
Source: PubMed Central journal article supplement (PMC7496347; doi:10.1111/tpj.14728), 2020-04-03
Supplement: TPJ-103-497-s001.pdf [file TPJ-103-497-s001.pdf]

**Figure S1**

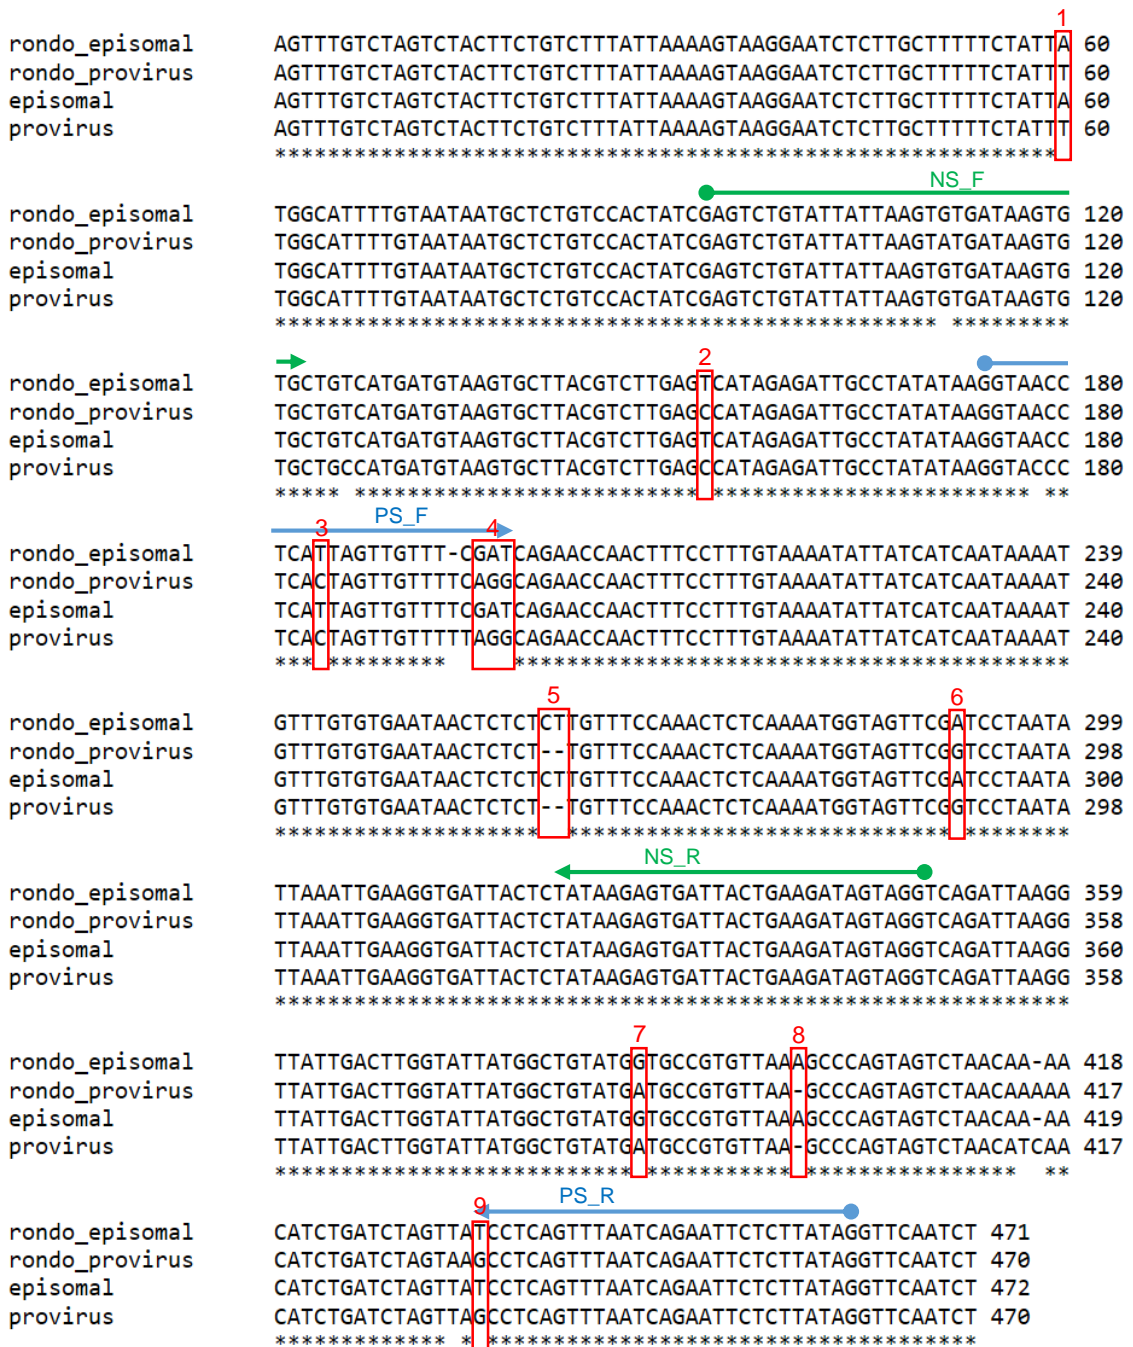

**Figure S1.** Difference in nucleotide sequences between proviral and episomal PVCVs. The nucleotide sequence of the promoter region of proviral PVCV is different from that of episomal DNA in *P. hybrida* (Richert-Poggeler et al., 2003). The nucleotide sequences of PCR fragments amplified from total RNAs prepared from 4-month-old petunia plants of cv. Rondo Rose-Star were compared with those of proviral and episomal PVCVs deposited in public databases (AY228106 and U95208.2). Thereby, the most similar sequences (clones) with proviral and episomal PVCVs, respectively, were determined. Multiple alignment of these four nucleotide sequences of the promoter region of PVCV as well as the locations of two pairs of PCR primers designed for bisulfite sequencing are shown. One pair is designed to specifically amplify proviral sequences (provirus-specific primers, PS\_F and PS\_R), and the other is designed to amplify both proviral and episomal sequences (non-specific primers, NS\_F and NS\_R) (Table S3). The data shown in Figs. 3, 5 and S6 were obtained using provirus-specific primers and the data shown in Fig. S3 were obtained using non-specific primers.

**Figure S2**

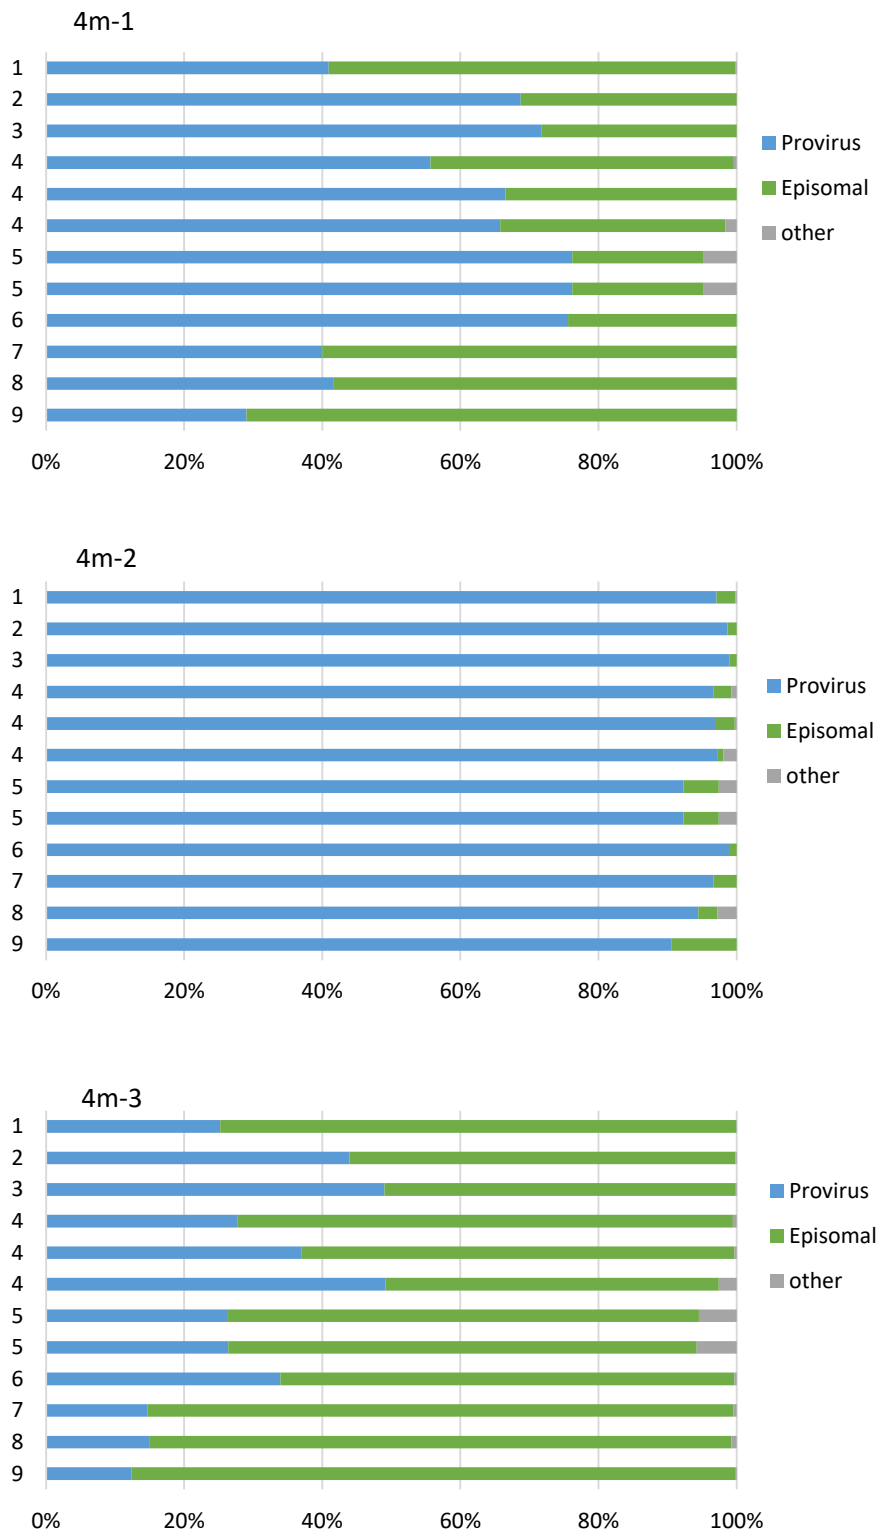

**Figure S2.** The ratios of proviral and episomal PVCV transcripts (reads) in RNA-seq datasets prepared from three independent 4-month-old plants of petunia cv. Rondo Rose-Star. The ratios were calculated from the number of reads on nine distinguishable sites between proviral and episomal sequences, which are shown in Figure S1, in RNA-seq datasets.

**Figure S3**

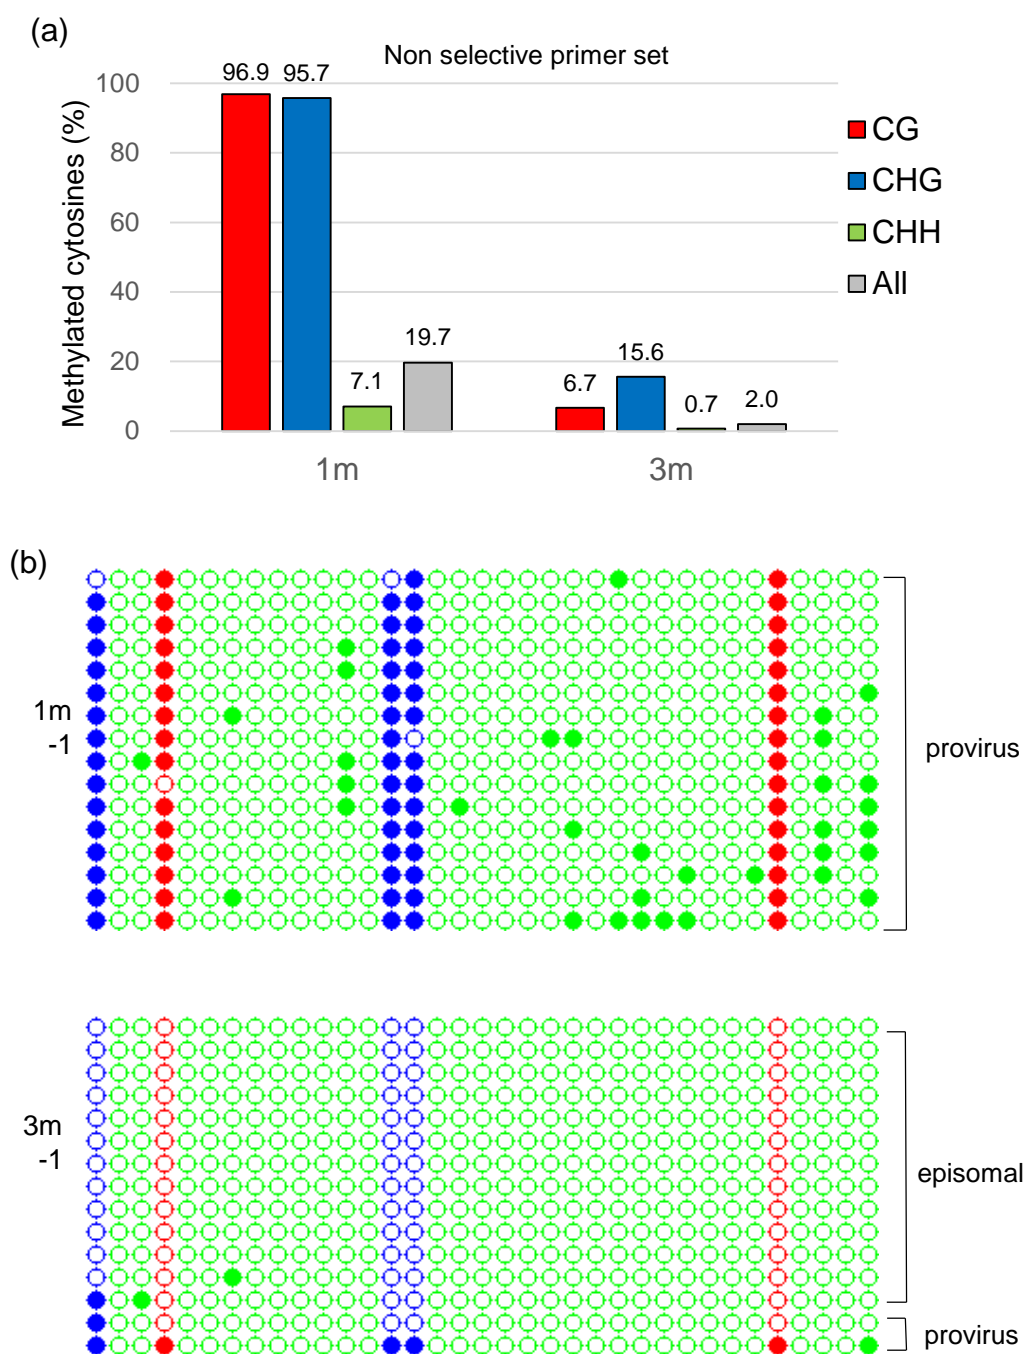

**Figure S3.** Methylation states of the promoter region of PVCV analyzed using the bisulfite sequencing method. Genomic DNAs were prepared from leaves of three 1-month-old (1m) and three 3-month-old (3m) plants and treated using a bisulfite reagent. The promoter regions of both proviral and episomal PVCV were amplified by PCR with non-specific PVCV primers (NS\_F and NS\_R in Figure S1 and Table S3), and sequenced. (a) The ratios of methylated cytosines in CG (red), CHG (blue) and CHH (green) sites were calculated from sequencing data of approximately 15 PCR clones. (b) Detailed presentation of methylated cytosines that are indicated as colored circles. Filled color circles, red (CG), blue (CHG), and green (CHH), indicate methylated cytosines, and open circles indicate unmethylated cytosines.

**Figure S4**

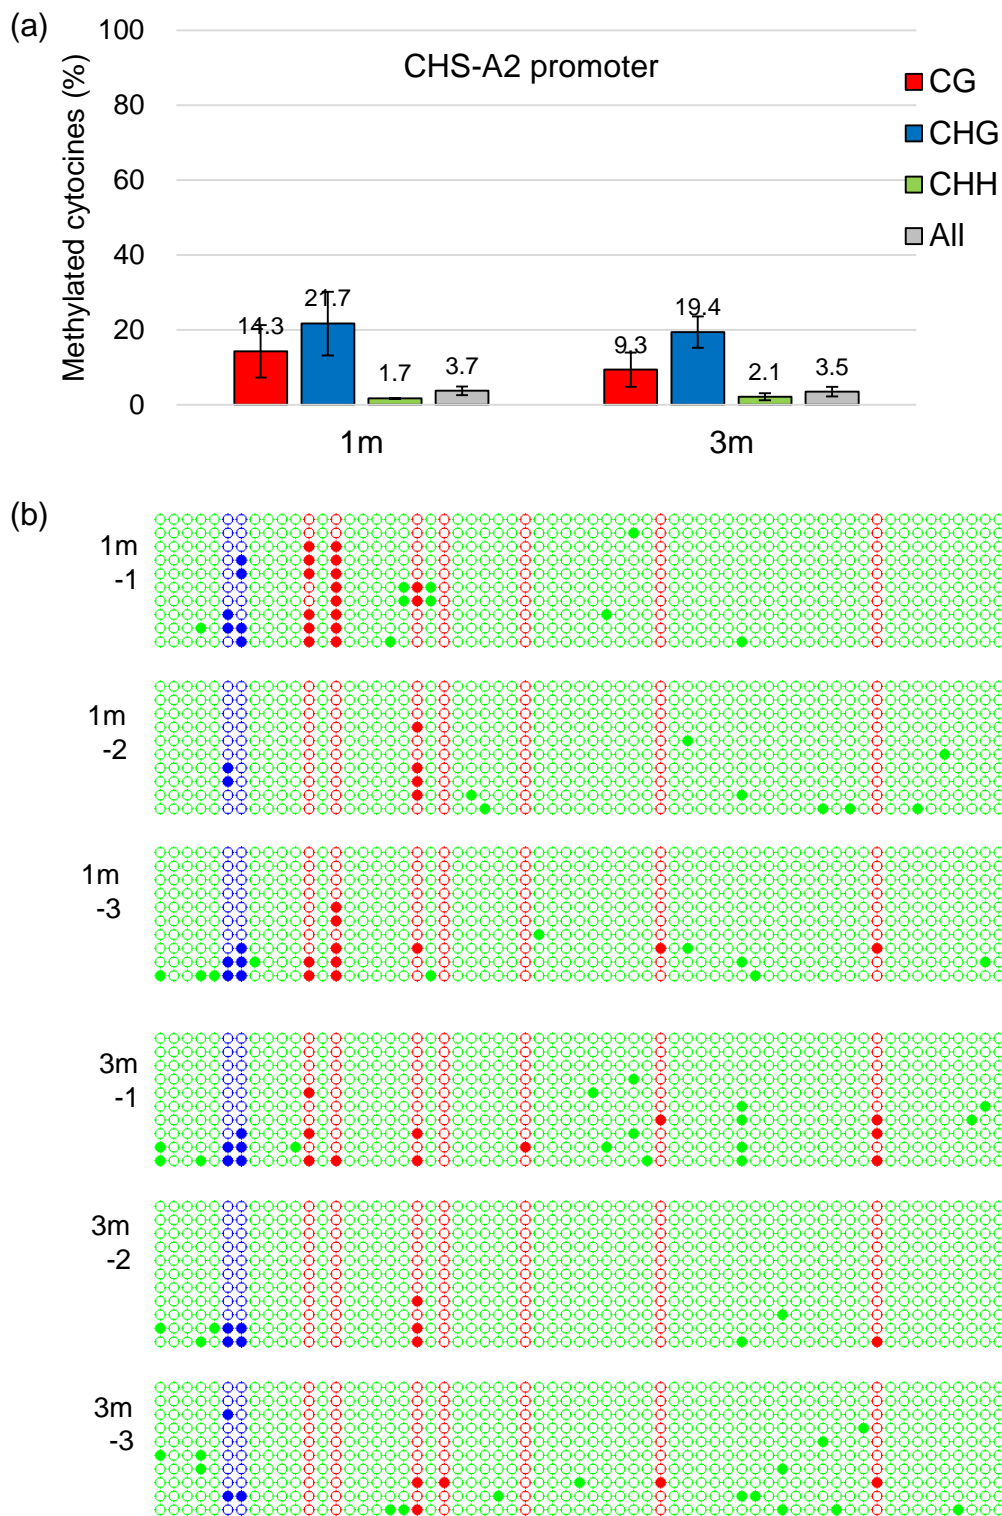

**Figure S4.** Methylation states of the promoter region of the *CHS-A2* gene analyzed using the bisulfite sequencing method. Genomic DNAs were prepared from leaves of three 1-month-old (1m) and three 3-month-old (3m) plants and treated using a bisulfite reagent. The promoter region of the *CHS-A2* gene was amplified by PCR and sequenced. (a) The ratios of methylated cytosines in CG (red), CHG (blue) and CHH (green) sites were calculated from sequencing data of approximately 30 PCR clones. (b) Detailed presentation of methylated cytosines that are indicated as colored circles. Filled color circles, red (CG), blue (CHG), and green (CHH), indicate methylated cytosines, and open circles indicate unmethylated cytosines.

Figure S5

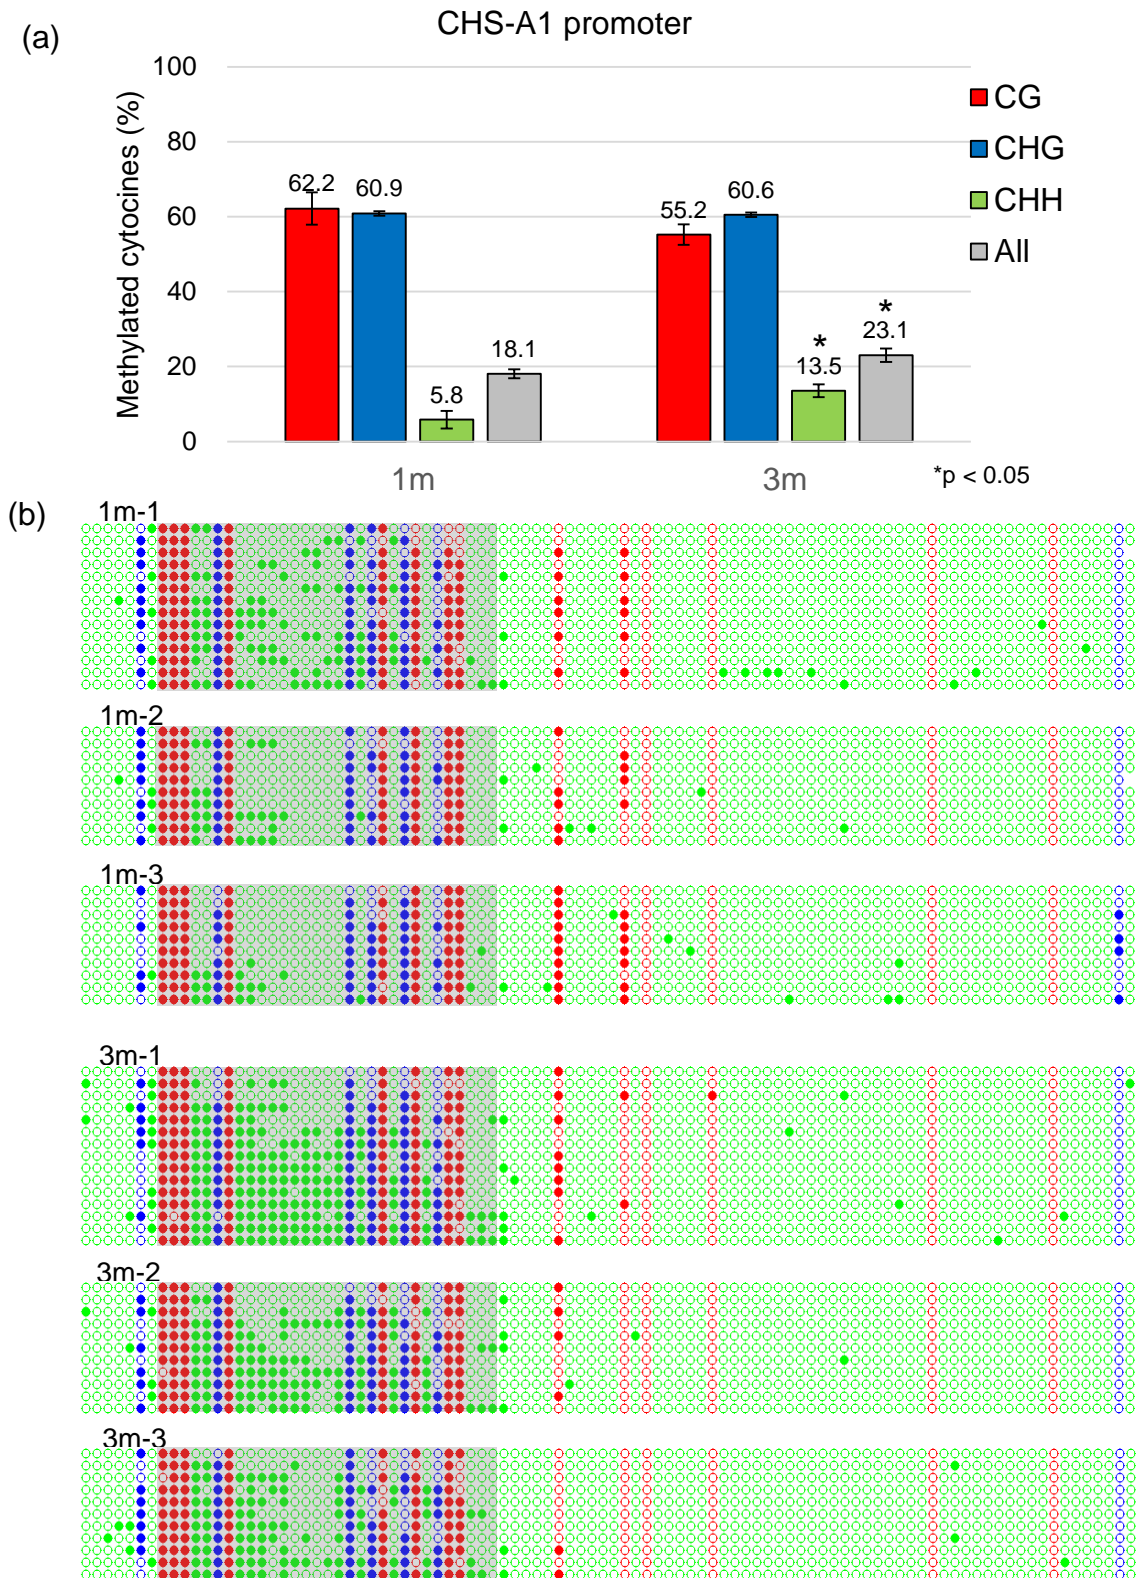

**Figure S5.** Methylation states of the promoter region of the *CHS-A1* gene analyzed using the bisulfite sequencing method. Genomic DNAs were prepared from leaves of three 1-month-old (1m) and three 3-month-old (3m) plants and treated using a bisulfite reagent. The promoter region of the *CHS-A1* gene was amplified by PCR and sequenced. (a) The ratios of methylated cytosines in CG (red), CHG (blue) and CHH (green) sites were calculated from sequencing data of approximately 30 PCR clones. p-values were determined using the Student's *t*-test. Asterisks (\*) indicate significant differences between 1- and 3-month-old plants ( $p < 0.05$ ). (b) Detailed presentation of methylated cytosines that are indicated as colored circles. Filled color circles, red (CG), blue (CHG), and green (CHH), indicate methylated cytosines, and open circles indicate unmethylated cytosines. Gray indicates a short transposon-like insertion.

Figure S6

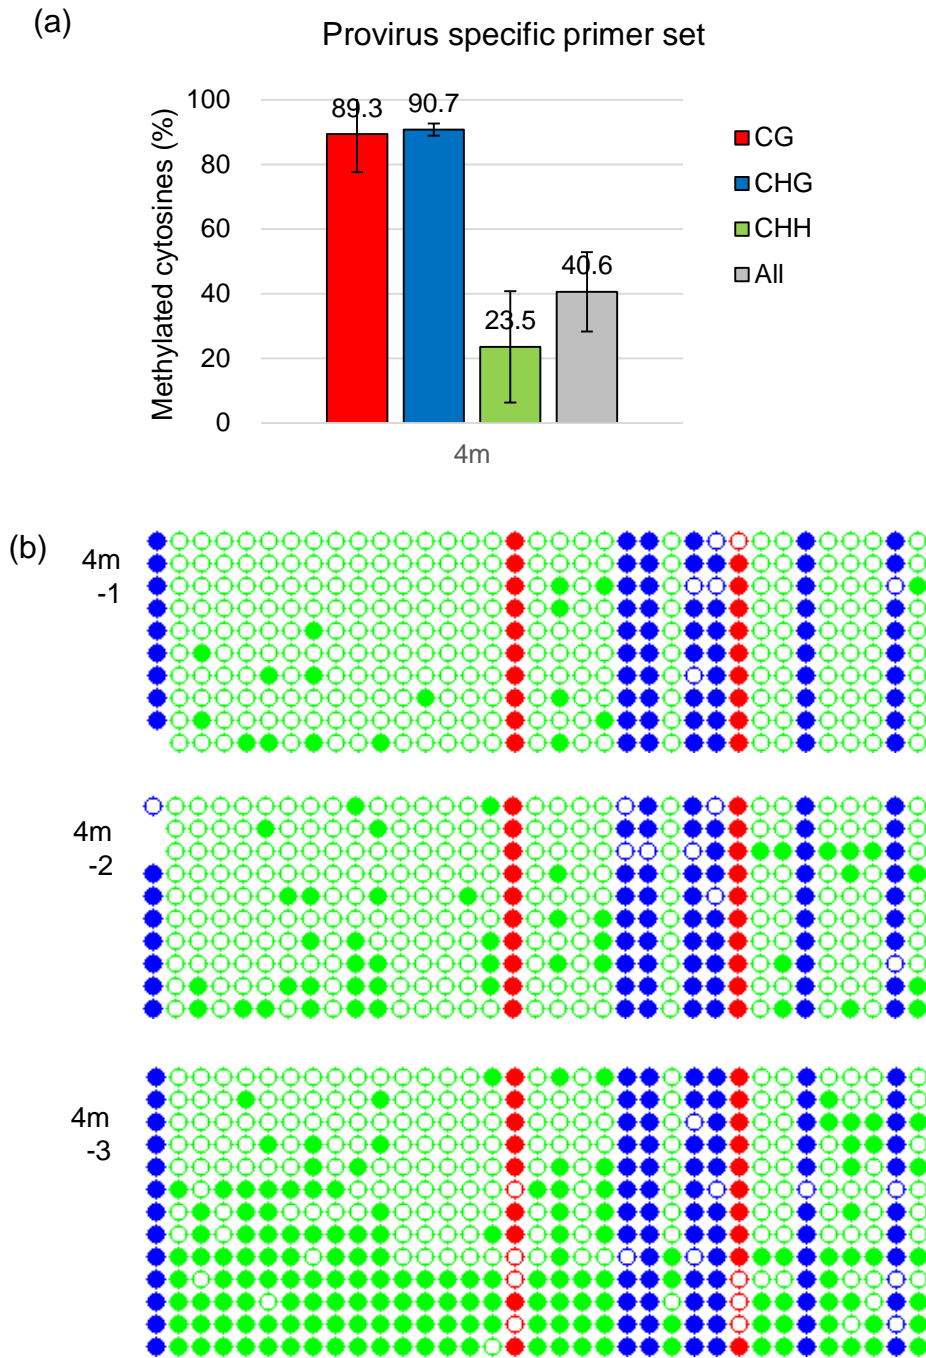

**Figure S6.** Methylation states of the promoter region of proviral PVCV analyzed using the bisulfite sequencing method. Genomic DNAs were prepared from leaves of three independent 4-month-old (4m) plants and treated using a bisulfite reagent. The promoter region of proviral PVCV was amplified by PCR with provirus-specific primers (Fig. S1 and Table S3), and sequenced. (a) The ratios of methylated cytosines in CG (red), CHG (blue) and CHH (green) sites were calculated from sequencing data of approximately 30 PCR clones. (b) Detailed presentation of methylated cytosines that are indicated as colored circles. Filled color circles, red (CG), blue (CHG), and green (CHH), indicate methylated cytosines, and open circles indicate unmethylated cytosines.

**Figure S7**

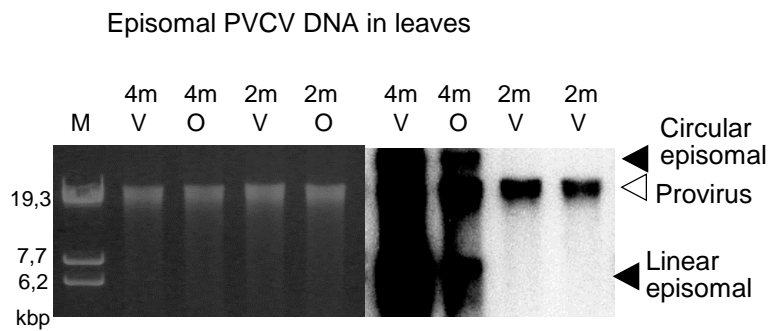

**Figure S7.** Detection of episomal PVCV DNA in leaves. DNA was isolated from the mid-vein and its surrounding regions (2m V) and the other regions (2m O) of leaves of 2-month-old plants and the mid-vein and its surrounding regions (4m V) and the other regions (4m O) of leaves with vein-clearing symptoms of 4-month-old plants. Proviral (a white arrowhead) and episomal (black arrowheads) PVCV DNAs were detected by Southern blot hybridization.

Fig. S8

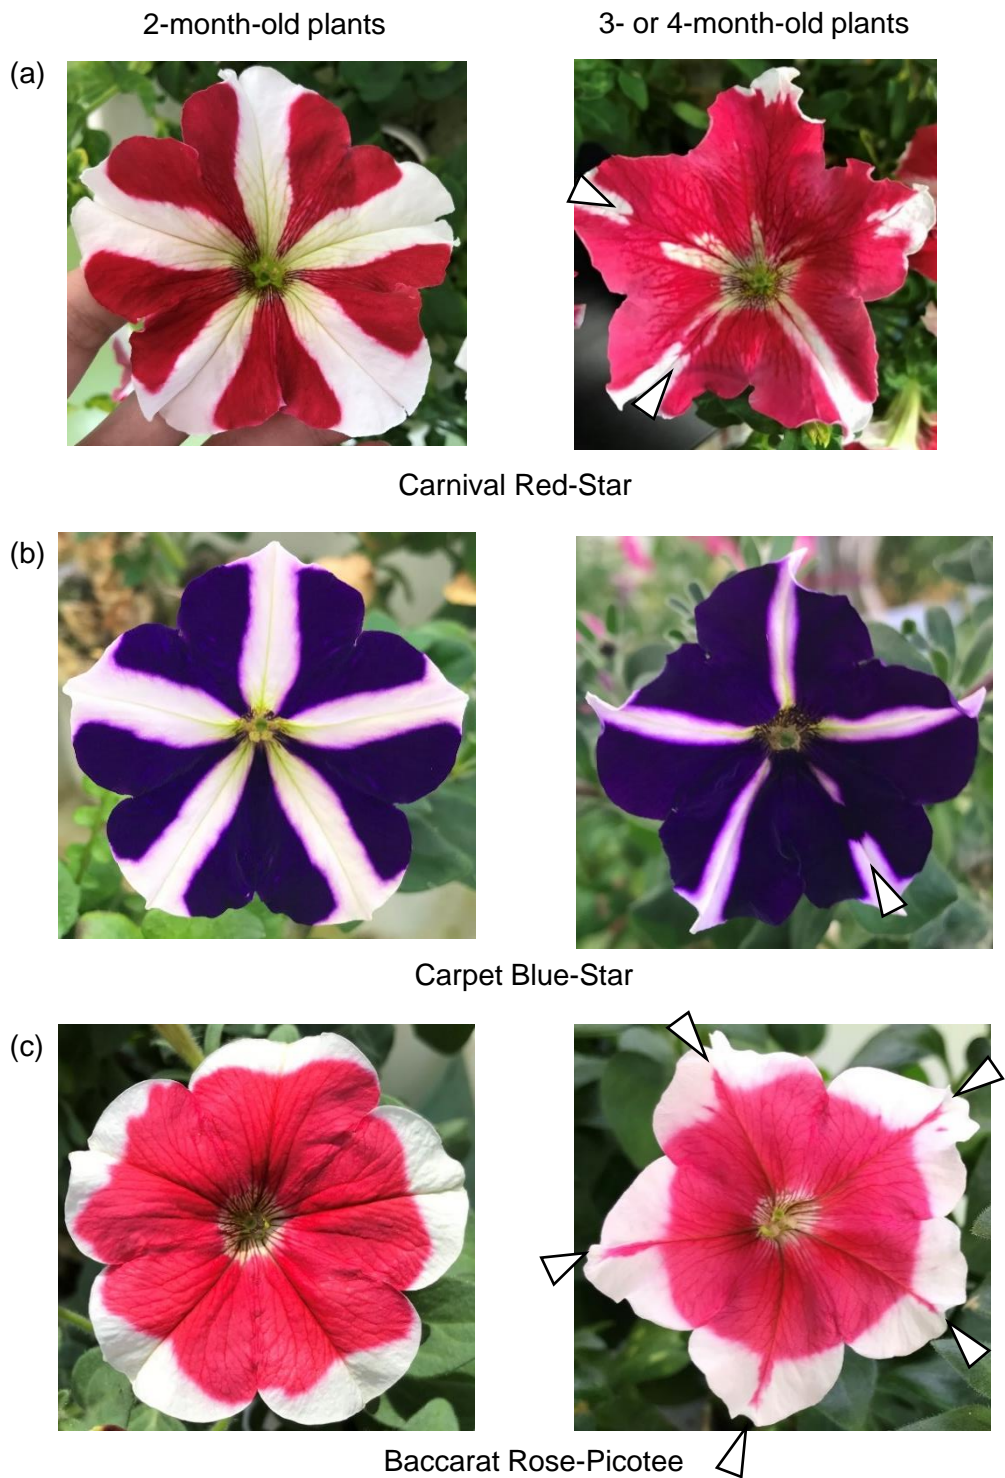

**Figure S8.** Occurrence of blotched flowers as the host plant ages. Blotched flowers were observed in petunia plants of three cultivars (a) Carnival Red-Star, (b) Carpet Blue-Star, and (c) Baccarat Rose-Picotee during long-term cultivation.
